# Supplementary material
Source: PubMed Central journal article supplement (PMC3487702)

**Cyclic voltammetry results for (MeC<sub>5</sub>H<sub>4</sub>)<sub>2</sub>Ti(dithiolate) derivatives.** Operating parameters: 100 mV/s , 1 mM analyte and internal Cp<sub>2</sub>Fe, glassy carbon working electrode, Ag wire reference electrode, 0.1 M NBu<sub>4</sub>PF<sub>6</sub> electrolyte, CH<sub>2</sub>Cl<sub>2</sub> solution.

| Dithiolate         | $E_{1/2}$ (V) | $i_{pa}/i_{pc}$ | $\Delta E_{Fc}$ (V) | $\Delta E_{sample}$ (V) |
|--------------------|---------------|-----------------|---------------------|-------------------------|
| adt <sup>NPh</sup> | -1.775        | 0.96            | 0.071               | 0.077                   |
| adt <sup>NBz</sup> | -1.880        | 0.78            | 0.084               | 0.071                   |
| adt <sup>NMe</sup> | -1.856        | 0.33            | 0.071               | 0.090                   |
| pdt                | -1.860        | 0.81            | 0.073               | 0.080                   |

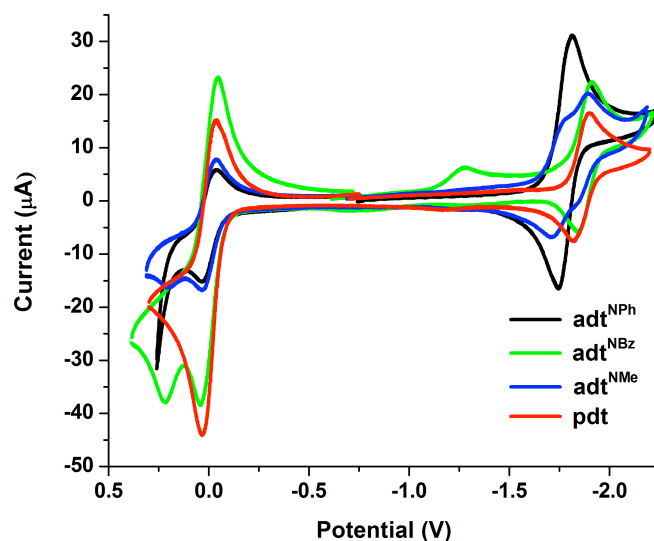

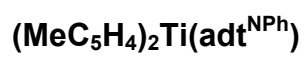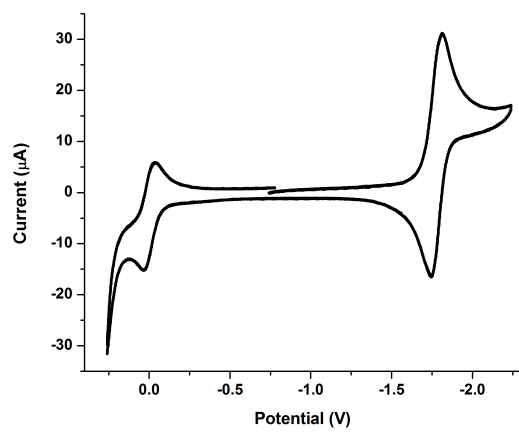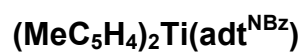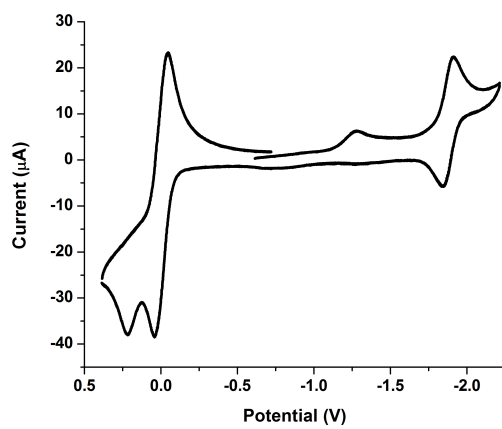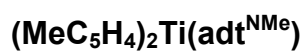

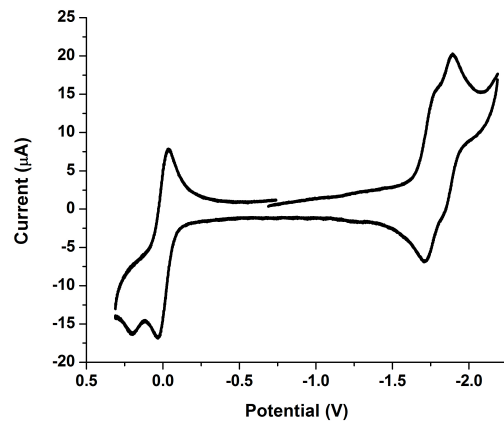

**$(\text{MeC}_5\text{H}_4)_2\text{Ti}(\text{pdt})$**

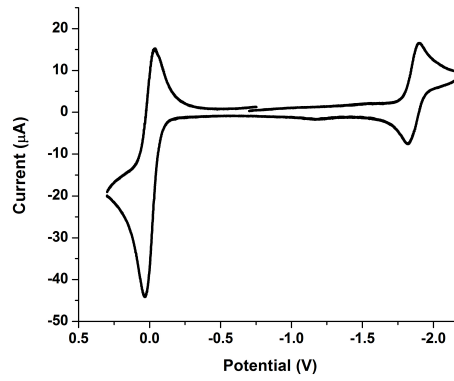

Supplement: NIHMS409967-supplement-supp_data.pdf [file NIHMS409967-supplement-supp_data.pdf]
